# Supplementary material
Source: PubMed Central journal article supplement (PMC8536939)

## **SUPPLEMENTARY MATERIALS**

### **A. Supplementary Tables I-12**

**Supplementary Table 1. Psychometric Testing of Cognitively Normal (CDR = 0) Group**

|                                      | Baseline Assessment<br>( <i>n</i> = 88) | Final Assessment<br>( <i>n</i> = 88) |
|--------------------------------------|-----------------------------------------|--------------------------------------|
| PACC, z score (SD)                   | -0.0962 (0.521)                         | -0.00995 (0.721)                     |
| Free & Cued Selective Reminding Test | -0.227 (0.764)                          | -0.0227 (1.02)                       |
| Delayed Recall Assessment            | -0.0796 (0.822)                         | 0.133 (0.9)                          |
| Digit Symbol Substitution Test       | -0.0557 (1.02)                          | -0.0922 (1.07)                       |
| MMSE                                 | -0.0225 (0.802)                         | 0.0379 (0.861)                       |

Clinical Dementia Rating: CDR; PACC: Preclinical Alzheimer Cognitive Composite; SD: standard deviation; MMSE: Mini-mental state examination

**Supplementary Table 2. Psychometric Testing of Cognitively Impaired (CDR > 0) Group**

|                                      | Baseline Assessment<br>( <i>n</i> = 12) | Final Assessment<br>( <i>n</i> = 12) |
|--------------------------------------|-----------------------------------------|--------------------------------------|
| PACC, z score (SD)                   | -1.11 (1.06)                            | -1.62 (1.61)                         |
| Free & Cued Selective Reminding Test | -1.42 (1.62)                            | -1.42 (1.73)                         |
| Delayed Recall Assessment            | -1.34 (1.18)                            | -1.41 (1.32)                         |
| Digit Symbol Substitution Test       | -0.867 (1.26)                           | -1.11 (1.52)                         |
| MMSE                                 | -0.678 (1.55)                           | -2.12 (2.76)                         |

Clinical Dementia Rating: CDR; PACC: Preclinical Alzheimer Cognitive Composite; SD: standard deviation; MMSE: Mini-mental state examination

**Supplementary Table 3: Generalized linear mixed models of the relationship between longitudinal PACC scores and total sleep time, sleep efficiency, NREM stage 2 and stage 3, and REM**

**Generalized Linear Mixed Models**

DV: PACC

N=100

| Covariate              | Time Sleep Time |                | Sleep Efficiency |                | NREM Stage 2 and 3 |                | REM       |                |
|------------------------|-----------------|----------------|------------------|----------------|--------------------|----------------|-----------|----------------|
|                        | Estimate        | 95% CI         | Estimate         | 95% CI         | Estimate           | 95% CI         | Estimate  | 95% CI         |
| Sleep Parameter        | -0.194*         | -0.353, -0.035 | -0.003           | -0.017, 0.012  | -0.001             | -0.004, 0.001  | -0.005    | -0.011, 0.0002 |
| CDR                    | -2.022***       | -2.696, -1.349 | -2.087***        | -2.783, -1.390 | -2.093***          | -2.786, -1.401 | -1.984*** | -2.670, -1.298 |
| CSF t-tau/A $\beta$ 42 | -1.427***       | -2.218, -0.635 | -1.314**         | -2.124, -0.503 | -1.336**           | -2.145, -0.526 | -1.369**  | -2.166, -0.573 |
| Age at Sleep Study     | -0.008          | -0.034, 0.019  | -0.016           | -0.042, 0.011  | -0.012             | -0.040, 0.015  | -0.016    | -0.042, 0.010  |
| Age at PACC            | -0.002          | -0.013, 0.009  | -0.002           | -0.013, 0.009  | -0.002             | -0.013, 0.009  | -0.002    | -0.013, 0.009  |
| ApoE $\epsilon$ 4+     | 0.247           | -0.023, 0.517  | 0.240            | -0.038, 0.519  | 0.242              | -0.036, 0.519  | 0.238     | -0.035, 0.511  |
| Sex (male effect)      | -0.341**        | -0.592, -0.089 | -0.278*          | -0.533, -0.023 | -0.303*            | -0.564, -0.042 | -0.292*   | -0.541, -0.043 |
| Education (years)      | 0.021           | -0.034, 0.075  | 0.021            | -0.035, 0.077  | 0.021              | -0.035, 0.077  | 0.024     | -0.031, 0.078  |
| Intercept              | 2.050           | -0.056, 4.157  | 1.534            | -0.781, 3.848  | 1.414              | -0.676, 3.503  | 1.761     | -0.331, 3.853  |

DV: Dependent Variable; PACC: Preclinical Alzheimer Cognitive Composite; NREM: non-rapid eye movement; REM: rapid eye movement; CDR: Clinical Dementia Rating; CSF: cerebrospinal fluid; A $\beta$ : amyloid- $\beta$ ; t-tau: total tau; ApoE $\epsilon$ 4+: apolipoprotein E  $\epsilon$ 4-positive status; CI: confidence intervals

\*p<0.05; \*\*p<0.01; \*\*\*p<0.001

**Supplementary Table 4: Generalized linear mixed models of the relationship between longitudinal PACC scores and <1 Hz NREM SWA and 1-4.5 Hz NREM SWA**

**Generalized Linear Mixed Models**

DV: PACC

N=100

| Covariate              | Ln (<1 Hz NREM SWA) |                | Ln (1-4.5 Hz NREM SWA) |                |
|------------------------|---------------------|----------------|------------------------|----------------|
|                        | Estimate            | 95% CI         | Estimate               | 95% CI         |
| Sleep Parameter        | -0.098              | -0.304, 0.107  | -0.090                 | -0.341, 0.161  |
| CDR                    | -1.878***           | -2.557, -1.200 | -1.897***              | -2.575, -1.218 |
| CSF t-tau/A $\beta$ 42 | -1.082*             | -1.895, -0.269 | -1.064*                | -1.877, -0.251 |
| Age at Sleep Study     | -0.013              | -0.039, 0.013  | -0.013                 | -0.039, 0.013  |
| Age at PACC            | -0.001              | -0.012, 0.010  | -0.001                 | -0.012, 0.010  |
| ApoE $\epsilon$ 4+     | 0.161               | -0.112, 0.435  | 0.168                  | -0.106, 0.441  |
| Sex (male effect)      | -0.357*             | -0.630, -0.084 | -0.346*                | -0.624, -0.068 |
| Education (years)      | 0.019               | -0.036, 0.073  | 0.018                  | -0.037, 0.072  |
| Intercept              | 1.495               | -0.588, 3.577  | 1.394                  | -0.668, 3.456  |

DV: Dependent Variable; PACC: Preclinical Alzheimer Cognitive Composite; NREM: non-rapid eye movement; SWA: slow wave activity; CDR: Clinical Dementia Rating; CSF: cerebrospinal fluid; A $\beta$ : amyloid- $\beta$ ; t-tau: total tau; ApoE $\epsilon$ 4+: apolipoprotein E  $\epsilon$ 4-positive status; CI: confidence intervals  
 \*p<0.05; \*\*p<0.01; \*\*\*p<0.001

**Supplementary Table 5. Generalized additive models of the relationship between longitudinal MMSE scores and total sleep time and <1 Hz NREM SWA**

**Generalized Additive Models**

DV: MMSE

N=100

|                   | Total Sleep Time | ln (<1 Hz NREM SWA) |
|-------------------|------------------|---------------------|
| <i>Spline Fit</i> | <i>EDF</i>       | <i>EDF</i>          |
| Sleep Parameter   | 2.0184***        | 1.0006              |
| Age at PACC       | 2.2605***        | 1.7961**            |
| Participant ID    | 7.522e-01*       | 0.7778*             |

| <i>Covariate</i>   | <i>Estimate</i> | <i>95% CI</i>  | <i>Estimate</i> | <i>95% CI</i>  |
|--------------------|-----------------|----------------|-----------------|----------------|
| CDR                | -1.683***       | -2.127, -1.238 | -1.379***       | -1.810, -0.949 |
| CSF t-tau/Aβ42     | -1.125***       | -1.596, -0.654 | -0.611*         | -1.076, -0.146 |
| Age at Sleep Study | 0.026*          | 0.002, 0.050   | 0.007           | -0.015, 0.030  |
| ApoEε4+            | 0.141           | -0.029, 0.311  | 0.105           | -0.058, 0.269  |
| Sex (male effect)  | -0.165*         | -0.318, -0.012 | -0.125          | -0.288, 0.038  |
| Education (years)  | 0.032           | -0.003, 0.067  | 0.023           | -0.011, 0.057  |
| Intercept          | -1.796          | -3.762, 0.171  | -0.344          | -2.237, 1.549  |

DV: Dependent Variable; MMSE: Mini-Mental State Examination; EDF: Effective Degrees of Freedom; NREM: non-rapid eye movement; SWA: slow wave activity; CDR: Clinical Dementia Rating; CSF: cerebrospinal fluid; Aβ: amyloid-β; t-tau: total tau; ApoEε4+: apolipoprotein E ε4-positive status; CI: confidence intervals

\*p<0.05; \*\*p<0.01; \*\*\*p<0.001

**Supplementary Table 6. Generalized additive models of the relationship between longitudinal FCSRT scores and total sleep time and <1 Hz NREM SWA**

**Generalized Additive Models**

DV: FCSRT

N=100

|                   | Total Sleep Time | ln (<1 Hz NREM SWA) |
|-------------------|------------------|---------------------|
| <i>Spline Fit</i> | <i>EDF</i>       | <i>EDF</i>          |
| Sleep Parameter   | 2.5717***        | 1.0004*             |
| Age at PACC       | 2.8192***        | 2.8013***           |
| Participant ID    | 6.946e-01        | 0.7302              |

| <i>Covariate</i>   | <i>Estimate</i> | <i>95% CI</i>  | <i>Estimate</i> | <i>95% CI</i>  |
|--------------------|-----------------|----------------|-----------------|----------------|
| CDR                | -1.776***       | -2.302, -1.251 | -1.505***       | -2.046, -0.963 |
| CSF t-tau/Aβ42     | -1.225***       | -1.740, -0.710 | -1.035***       | -1.573, -0.498 |
| Age at Sleep Study | 0.040**         | 0.015, 0.066   | 0.029*          | 0.002, 0.055   |
| ApoEε4+            | 0.118           | -0.066, 0.302  | 0.130           | -0.058, 0.319  |
| Sex (male effect)  | -0.241**        | -0.405, -0.078 | -0.323***       | -0.513, -0.134 |
| Education (years)  | 0.040*          | -0.077, -0.002 | -0.036          | -0.075, 0.004  |
| Intercept          | -1.715          | -3.789, 0.360  | -0.865          | -3.026, 1.296  |

DV: Dependent Variable; FCSRT: Free and Cued Selective Reminding Test; EDF: Effective Degrees of Freedom; NREM: non-rapid eye movement; SWA: slow wave activity; CDR: Clinical Dementia Rating; CSF: cerebrospinal fluid; Aβ: amyloid-β; t-tau: total tau; ApoEε4+: apolipoprotein E ε4-positive status; CI: confidence intervals

\*p<0.05; \*\*p<0.01; \*\*\*p<0.001

**Supplementary Table 7. Generalized additive models of the relationship between longitudinal DSST scores and total sleep time and <1 Hz NREM SWA**

**Generalized Additive Models**

DV: DSST

N=100

|                   | Total Sleep Time | ln (<1 Hz NREM SWA) |
|-------------------|------------------|---------------------|
| <i>Spline Fit</i> | <i>EDF</i>       | <i>EDF</i>          |
| Sleep Parameter   | 1.6736           | 2.8362***           |
| Age at PACC       | 2.7436***        | 2.7630***           |
| Participant ID    | 8.389e-01*       | 0.8152*             |

| <i>Covariate</i>       | <i>Estimate</i> | <i>95% CI</i>  | <i>Estimate</i> | <i>95% CI</i>  |
|------------------------|-----------------|----------------|-----------------|----------------|
| CDR                    | -0.731**        | -1.191, -0.271 | -0.592*         | -1.047, -0.137 |
| CSF t-tau/A $\beta$ 42 | -1.005***       | -1.494, -0.516 | -1.034***       | -1.529, -0.539 |
| Age at Sleep Study     | 0.045***        | 0.020, 0.070   | 0.044***        | 0.019, 0.068   |
| ApoE $\epsilon$ 4+     | 0.327***        | 0.152, 0.502   | 0.280**         | 0.108, 0.453   |
| Sex (male effect)      | -0.303***       | -0.461, -0.145 | -0.440**        | -0.611, -0.269 |
| Education (years)      | 0.014           | -0.023, 0.051  | 0.017           | -0.019, 0.054  |
| Intercept              | -3.794***       | -5.839, -1.750 | -3.593***       | -5.605, -1.580 |

DV: Dependent Variable; DSST: Digit Symbol Substitution Test; EDF: Effective Degrees of Freedom; NREM: non-rapid eye movement; SWA: slow wave activity; CDR: Clinical Dementia Rating; CSF: cerebrospinal fluid; A $\beta$ : amyloid- $\beta$ ; t-tau: total tau; ApoE $\epsilon$ 4+: apolipoprotein E  $\epsilon$ 4-positive status; CI: confidence intervals

\*p<0.05; \*\*p<0.01; \*\*\*p<0.001

**Supplementary Table 8. Generalized additive models of the relationship between longitudinal Logical Memory test scores and total sleep time and <1 Hz NREM SWA**

**Generalized Additive Models**

DV: LM

N=100

|                   | Total Sleep Time |  | ln (<1 Hz NREM SWA) |  |
|-------------------|------------------|--|---------------------|--|
| <i>Spline Fit</i> | <i>EDF</i>       |  | <i>EDF</i>          |  |
| Sleep Parameter   | 1.765***         |  | 2.5033849***        |  |
| Age at PACC       | 2.622***         |  | 2.6707195***        |  |
| Participant ID    | 6.529e-04        |  | 2.612e-04           |  |

  

| <i>Covariate</i>   | <i>Estimate</i> | <i>95% CI</i>  | <i>Estimate</i> | <i>95% CI</i>  |
|--------------------|-----------------|----------------|-----------------|----------------|
| CDR                | -2.282***       | -2.762, -1.801 | -2.088***       | -2.579, -1.597 |
| CSF t-tau/Aβ42     | -1.045***       | -1.568, -0.521 | -0.625*         | -1.176, -0.075 |
| Age at Sleep Study | 0.030*          | 0.001, 0.058   | 0.009           | -0.020, 0.038  |
| ApoEε4+            | -0.012          | -0.202, 0.178  | 0.009           | -0.185, 0.203  |
| Sex (male effect)  | -0.244**        | -0.413, -0.074 | -0.001          | -0.194, 0.192  |
| Education (years)  | 0.029           | -0.009, 0.068  | 0.014           | -0.026, 0.054  |
| Intercept          | -2.245          | -4.560, 0.069  | -0.666          | -3.042, 1.709  |

DV: Dependent Variable; LM: Logical Memory test; EDF: Effective Degrees of Freedom; NREM: non-rapid eye movement; SWA: slow wave activity; CDR: Clinical Dementia Rating; CSF: cerebrospinal fluid; Aβ: amyloid-β; t-tau: total tau; ApoEε4+: apolipoprotein E ε4-positive status; CI: confidence intervals

\*p<0.05; \*\*p<0.01; \*\*\*p<0.001

**Supplementary Table 9: Generalized linear mixed models of the relationship between longitudinal MMSE scores and total sleep time and <1 Hz NREM SWA**

**Generalized Linear Mixed Models**

DV: MMSE

N=100

| Covariate              | Time Sleep Time |                | ln (<1 Hz NREM SWA) |                |
|------------------------|-----------------|----------------|---------------------|----------------|
|                        | Estimate        | 95% CI         | Estimate            | 95% CI         |
| Sleep Parameter        | -0.163          | -0.346, 0.019  | 0.067               | -0.147, 0.280  |
| CDR                    | -2.126***       | -2.914, -1.339 | -1.826***           | -2.546, -1.107 |
| CSF t-tau/A $\beta$ 42 | -1.685***       | -2.592, -0.779 | -1.000*             | -1.838, -0.161 |
| Age at Sleep Study     | -0.007          | -0.040, 0.027  | -0.013              | -0.043, 0.017  |
| Age at PACC            | -0.017          | -0.038, 0.005  | -0.013              | -0.034, 0.008  |
| ApoE $\epsilon$ 4+     | 0.237           | -0.075, 0.549  | 0.135               | -0.150, 0.421  |
| Sex (male effect)      | -0.241          | -0.530, 0.049  | -0.186              | -0.470, 0.098  |
| Education (years)      | 0.041           | -0.022, 0.103  | 0.025               | -0.031, 0.082  |
| Intercept              | 2.619*          | 0.196, 5.042   | 1.641               | -0.510, 3.791  |

DV: Dependent Variable; MMSE: Mini-Mental State Examination; NREM: non-rapid eye movement; SWA: slow wave activity; CDR: Clinical Dementia Rating; CSF: cerebrospinal fluid; A $\beta$ : amyloid- $\beta$ ; t-tau: total tau; ApoE $\epsilon$ 4+: apolipoprotein E  $\epsilon$ 4-positive status; CI: confidence intervals  
 \*p<0.05; \*\*p<0.01; \*\*\*p<0.001



**Supplementary Table 10: Generalized linear mixed models of the relationship between longitudinal FCSRT scores and total sleep time and <1 Hz NREM SWA**

**Generalized Linear Mixed Models**

DV: FCSRT

N=100

| Covariate              | Time Sleep Time |                | ln (<1 Hz NREM SWA) |                |
|------------------------|-----------------|----------------|---------------------|----------------|
|                        | Estimate        | 95% CI         | Estimate            | 95% CI         |
| Sleep Parameter        | -0.263*         | -0.481, -0.045 | -0.169              | -0.457, 0.119  |
| CDR                    | -2.323***       | -3.312, -1.334 | -2.281***           | -3.297, -1.265 |
| CSF t-tau/A $\beta$ 42 | -1.286*         | -2.398, -0.174 | -1.172*             | -2.309, -0.034 |
| Age at Sleep Study     | 0.001           | -0.036, 0.038  | -0.007              | -0.044, 0.030  |
| Age at PACC            | 0.007           | -0.012, 0.026  | 0.008               | -0.011, 0.027  |
| ApoE $\epsilon$ 4+     | 0.148           | -0.225, 0.520  | 0.094               | -0.293, 0.481  |
| Sex (male effect)      | -0.306          | -0.646, 0.035  | -0.320              | -0.704, 0.064  |
| Education (years)      | -0.037          | -0.110, 0.037  | -0.030              | -0.106, 0.046  |
| Intercept              | 2.026           | -0.827, 4.880  | 1.481               | -1.427, 4.388  |

DV: Dependent Variable; FCSRT: Free and Cued Selective Reminding Test; NREM: non-rapid eye movement; SWA: slow wave activity; CDR: Clinical Dementia Rating; CSF: cerebrospinal fluid; A $\beta$ : amyloid- $\beta$ ; t-tau: total tau; ApoE $\epsilon$ 4+: apolipoprotein E  $\epsilon$ 4-positive status; CI: confidence intervals  
 \*p<0.05; \*\*p<0.01; \*\*\*p<0.001

**Supplementary Table 11: Generalized linear mixed models of the relationship between longitudinal DSST scores and total sleep time and <1 Hz NREM SWA**

**Generalized Linear Mixed Models**

DV: DSST

N=100

| Covariate                    | Time Sleep Time |                | ln (<1 Hz NREM SWA) |                |
|------------------------------|-----------------|----------------|---------------------|----------------|
|                              | Estimate        | 95% CI         | Estimate            | 95% CI         |
| Sleep Parameter              | -0.101          | -0.353, 0.151  | -0.311              | -0.634, 0.012  |
| CDR                          | -1.161*         | -2.222, -0.100 | -1.047              | -2.111, 0.018  |
| CSF $\tau$ -tau/A $\beta$ 42 | -0.987          | -2.240, 0.265  | -0.997              | -2.278, 0.283  |
| Age at Sleep Study           | -0.011          | -0.053, 0.030  | -0.010              | -0.050, 0.030  |
| Age at PACC                  | -0.019**        | -0.032, -0.007 | -0.019**            | -0.032, -0.007 |
| ApoE $\epsilon$ 4+           | 0.468*          | 0.041, 0.895   | 0.381               | -0.049, 0.812  |
| Sex (male effect)            | -0.482*         | -0.880, -0.084 | -0.641**            | -1.070, -0.212 |
| Education (years)            | 0.024           | -0.061, 0.110  | 0.035               | -0.051, 0.120  |
| Intercept                    | 2.790           | -0.540, 6.121  | 3.206               | -0.075, 6.488  |

DV: Dependent Variable; DSST: Digit Symbol Substitution Test; NREM: non-rapid eye movement; SWA: slow wave activity; CDR: Clinical Dementia Rating; CSF: cerebrospinal fluid; A $\beta$ : amyloid- $\beta$ ;  $\tau$ -tau: total tau; ApoE $\epsilon$ 4+: apolipoprotein E  $\epsilon$ 4-positive status; CI: confidence intervals

\*p<0.05; \*\*p<0.01; \*\*\*p<0.001

**Supplementary Table 12: Generalized linear mixed models of the relationship between longitudinal Logical Memory Test scores and total sleep time and <1 Hz NREM SWA**

**Generalized Linear Mixed Models**

DV: LM

N=100

| Covariate              | Time Sleep Time |                | ln (<1 Hz NREM SWA) |                |
|------------------------|-----------------|----------------|---------------------|----------------|
|                        | Estimate        | 95% CI         | Estimate            | 95% CI         |
| Sleep Parameter        | -0.235*         | -0.438, -0.031 | 0.053               | -0.219, 0.324  |
| CDR                    | -2.514***       | -3.380, -1.648 | -2.444***           | -3.342, -1.546 |
| CSF t-tau/A $\beta$ 42 | -1.278*         | -2.285, -0.271 | -0.889              | -1.956, 0.178  |
| Age at Sleep Study     | -0.007          | -0.044, 0.029  | -0.017              | -0.053, 0.020  |
| Age at PACC            | 0.029**         | 0.008, 0.049   | 0.030**             | 0.009, 0.051   |
| ApoE $\epsilon$ 4+     | 0.071           | -0.277, 0.418  | 0.026               | -0.336, 0.388  |
| Sex (male effect)      | -0.283          | -0.605, 0.040  | -0.190              | -0.551, 0.171  |
| Education (years)      | 0.046           | -0.023, 0.116  | 0.039               | -0.033, 0.111  |
| Intercept              | -0.337          | -3.042, 2.369  | -1.408              | -4.144, 1.328  |

DV: Dependent Variable; LM: Logical Memory Test; NREM: non-rapid eye movement; SWA: slow wave activity; CDR: Clinical Dementia Rating; CSF: cerebrospinal fluid; A $\beta$ : amyloid- $\beta$ ; t-tau: total tau; ApoE $\epsilon$ 4+: apolipoprotein E  $\epsilon$ 4-positive status; CI: confidence intervals  
 \*p<0.05; \*\*p<0.01; \*\*\*p<0.001

Supplementary Figure 1: Histogram of follow-up intervals for all participants.

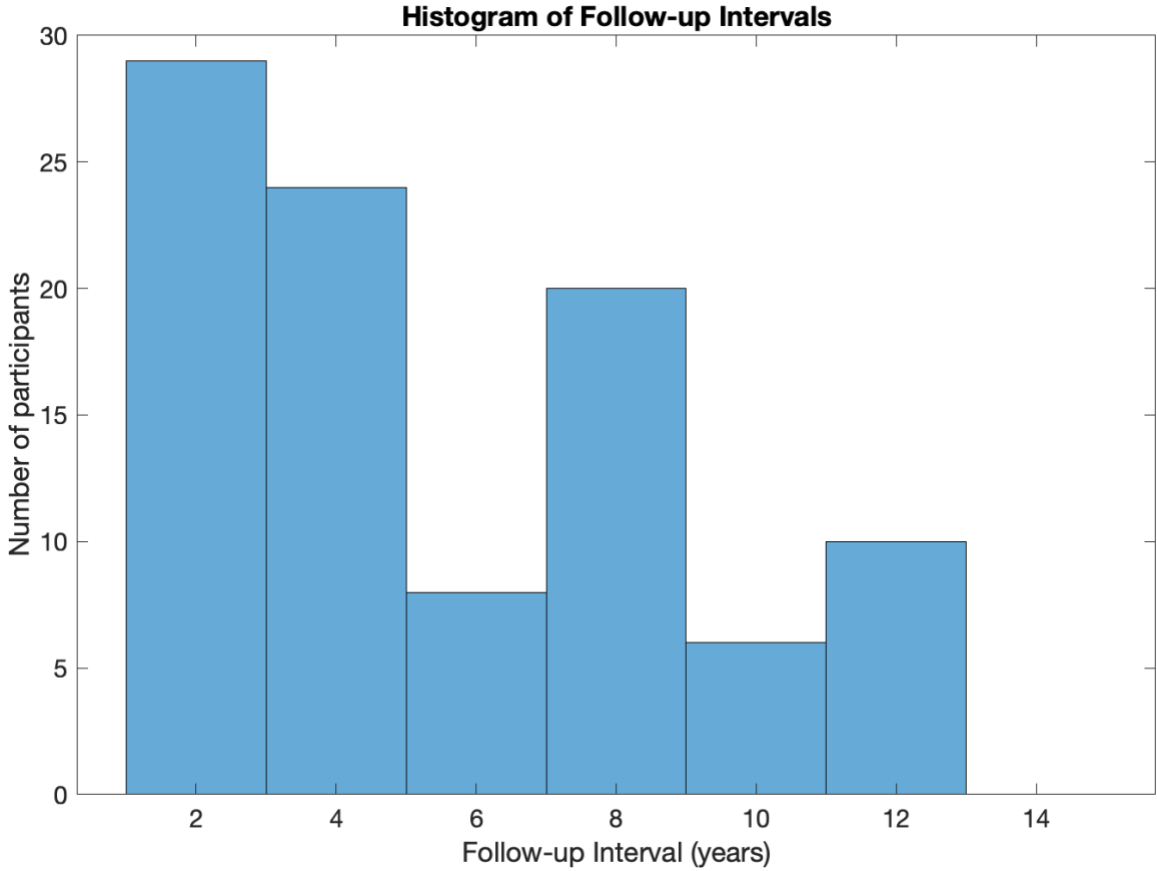

Supplement: awab272_supplememtary_data.pdf [file awab272_supplememtary_data.pdf]
